# Supplementary material
Source: Springer Nature journal article supplement (https://www.springermedizin.de/resource/supplementary/12936_2011_2024_MOESM6_ESM.pdf/9543350)

IFN- $\gamma$

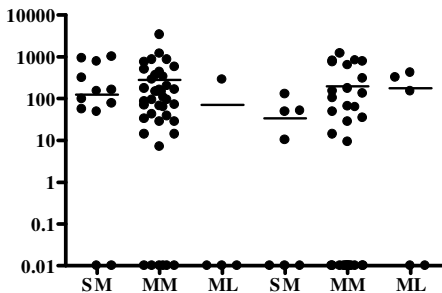

TNF

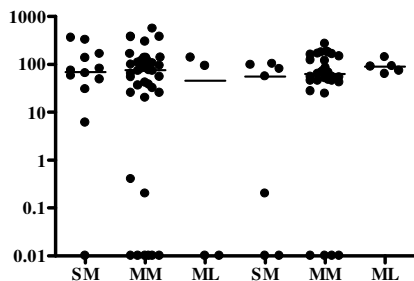

IL-1 $\beta$

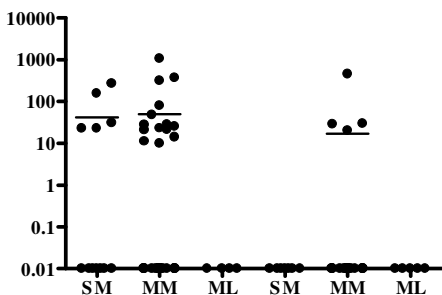

IL-6

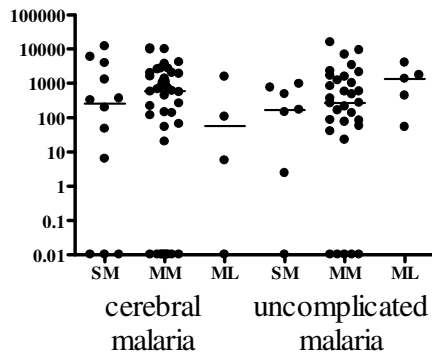

IL-10

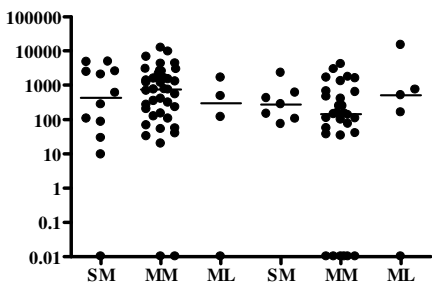

cerebral malaria      uncomplicated malaria

Supplement: MOESM6 [file 9543350]
